# Supplementary material for: Myopia in African Americans Is Significantly Linked to Chromosome 7p15.2-14.2
Source: PubMed Central journal article supplement — Invest Ophthalmol Vis Sci. 2021 Jul 9;62(9):16. doi: 10.1167/iovs.62.9.16 (PMC8287048; doi:10.1167/iovs.62.9.16), 2021-07-09
Supplement: iovs-62-9-16_s001.pdf [file iovs-62-9-16_s001.pdf]

Supplementary Figure S1: Chromosome 7 HLODs scores for gene-based two-point linkage analysis.

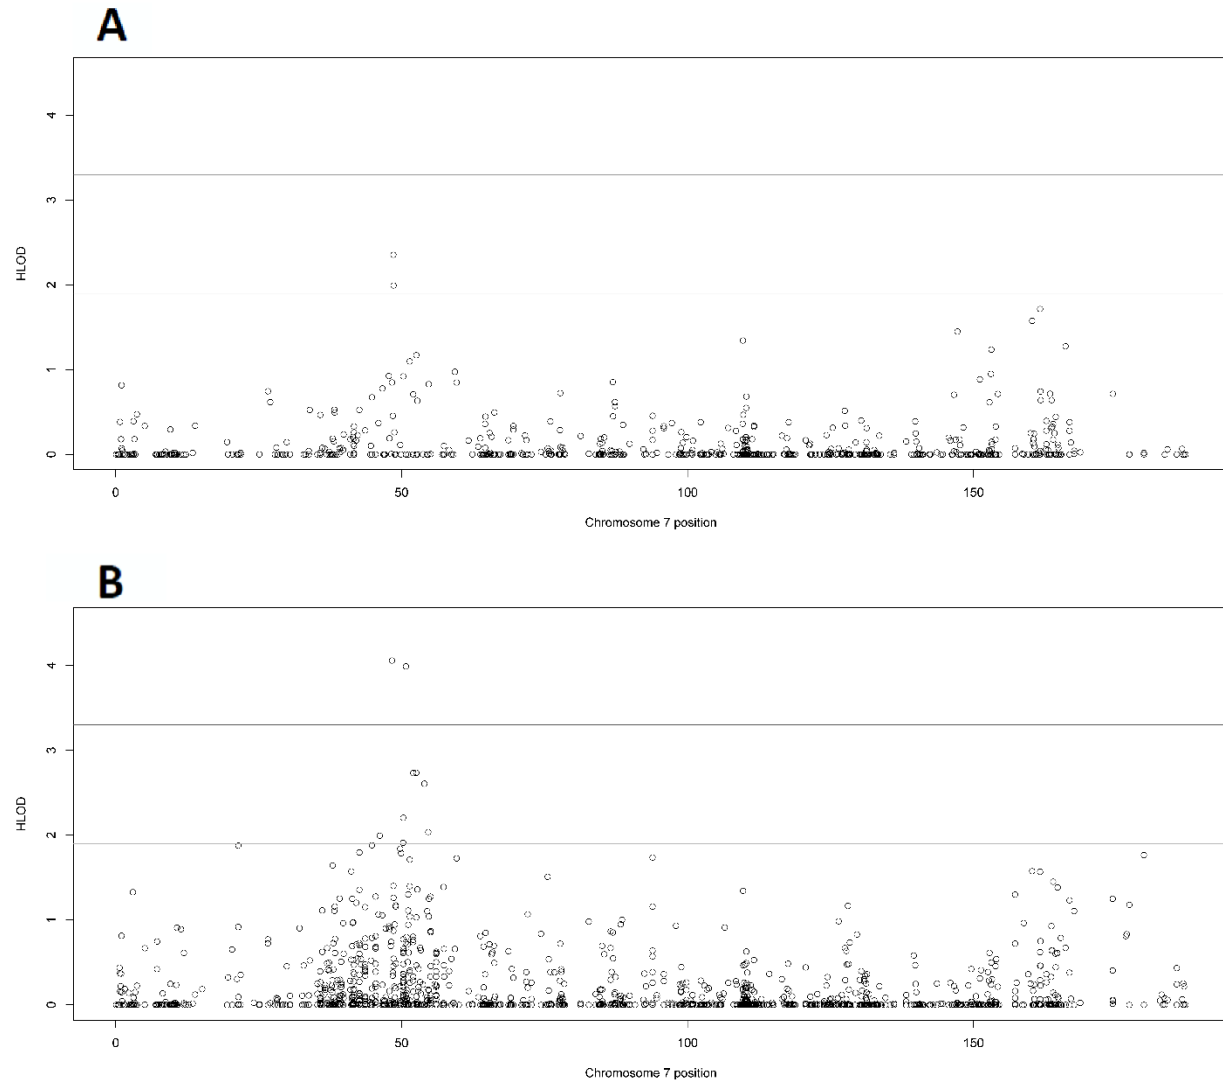

(A) the gene-based HLOD scores using only the rare variants (MAF  $\geq 0.05$ ) and (B) the gene-based HLOD scores using all variants. The lines at 3.3 and 1.9 represent the respective significant and suggestive thresholds as suggested by Lander and Kruglyak

**Supplementary Figure S2: Heat map of mean ocular expression values for significant and suggestive genes from variant-based two-point linkage analysis.**

| CHR | POS       | HLOD | GENE      | Choroid.PLIER | Ciliary_body.PLIER | Cornea.PLIER | Iris.PLIER | Lens.PLIER | Optic_nerve.PLIER | Optic_nerve_head.PLIER | Retina.PLIER | Sclera.PLIER | Trabecular_meshwork.PLIER |
|-----|-----------|------|-----------|---------------|--------------------|--------------|------------|------------|-------------------|------------------------|--------------|--------------|---------------------------|
| 7   | 25997536  | 4.34 | NFE2L3    | 23.0          | 4.8                | 7.9          | 31.0       | 17.0       | 12.1              | 18.4                   | 19.8         | 10.4         | 7.4                       |
| 7   | 28754095  | 3.01 | CREB5     | 51.6          | 46.0               | 32.7         | 36.9       | 67.9       | 96.4              | 113.0                  | 44.6         | 49.9         | 47.4                      |
| 7   | 27562660  | 2.82 | HIBADH    | 53.5          | 55.9               | 67.2         | 51.1       | 91.0       | 70.7              | 74.7                   | 59.8         | 50.6         | 108.2                     |
| 7   | 27562660  | 2.82 | EVX1      | 27.3          | 44.5               | 33.6         | 28.4       | 34.9       | 34.0              | 42.4                   | 27.1         | 38.0         | 36.4                      |
| 20  | 23424613  | 2.75 | CSTL1     | 66.8          | 45.2               | 77.5         | 31.0       | 68.8       | 85.4              | 76.8                   | 71.4         | 96.6         | 73.3                      |
| 2   | 41792845  | 2.59 | SLC8A1    | 20.6          | 16.7               | 10.8         | 21.9       | 19.7       | 28.8              | 33.3                   | 54.9         | 30.8         | 22.2                      |
| 7   | 33959239  | 2.49 | BMPER     | 41.3          | 35.9               | 47.6         | 27.2       | 27.6       | 26.8              | 34.6                   | 29.4         | 41.9         | 49.9                      |
| 9   | 117118379 | 2.48 | AKNA      | 34.5          | 35.8               | 35.0         | 30.8       | 40.0       | 40.3              | 40.3                   | 41.8         | 43.4         | 34.3                      |
| 7   | 31877261  | 2.42 | PDE1C     | 57.7          | 21.7               | 13.0         | 39.5       | 32.3       | 76.8              | 71.9                   | 30.8         | 71.8         | 46.9                      |
| 7   | 36438709  | 2.40 | ANLN      | 8.6           | 11.9               | 34.3         | 7.4        | 8.1        | 374.1             | 377.0                  | 8.7          | 7.5          | 9.8                       |
| 7   | 32611392  | 2.35 | AVL9      | 25.4          | 17.4               | 45.8         | 25.3       | 39.3       | 38.4              | 44.3                   | 43.2         | 23.2         | 42.3                      |
| 6   | 152708310 | 2.29 | SYNE1     | 39.4          | 42.4               | 52.4         | 27.2       | 31.0       | 46.4              | 73.2                   | 73.0         | 54.1         | 70.5                      |
| 1   | 26607726  | 2.27 | SH3BGRL3  | 59.4          | 66.7               | 133.1        | 56.6       | 28.2       | 57.2              | 50.8                   | 33.5         | 49.4         | 34.5                      |
| 1   | 26612460  | 2.27 | UBXN11    | 35.9          | 41.1               | 39.0         | 26.1       | 28.2       | 45.9              | 34.1                   | 33.5         | 49.4         | 34.5                      |
| 19  | 53086032  | 2.26 | ZNF701    | 15.9          | 7.7                | 39.0         | 3.3        | 22.1       | 12.5              | 6.8                    | 17.3         | 12.6         | 18.1                      |
| 10  | 5920244   | 2.26 | ANKRD16   | 35.2          | 27.4               | 32.5         | 28.3       | 25.2       | 28.9              | 28.6                   | 22.8         | 33.9         | 33.7                      |
| 18  | 3458997   | 2.26 | TGIF1     | 42.4          | 38.3               | 46.0         | 28.7       | 40.7       | 37.2              | 30.9                   | 26.5         | 42.6         | 43.5                      |
| 6   | 160610124 | 2.23 | SLC22A2   | 22.3          | 33.7               | 22.5         | 23.6       | 22.4       | 30.9              | 35.8                   | 28.5         | 22.0         | 24.0                      |
| 6   | 160610124 | 2.23 | SLC22A1   | 44.1          | 44.0               | 46.9         | 31.1       | 37.0       | 45.8              | 46.0                   | 43.7         | 43.1         | 41.7                      |
| 7   | 29647662  | 2.16 | PRR15     | 66.2          | 97.1               | 76.2         | 46.7       | 51.5       | 66.4              | 71.5                   | 70.5         | 65.6         | 64.9                      |
| 7   | 24571485  | 2.15 | MPP6      | 29.8          | 22.8               | 128.6        | 19.1       | 281.5      | 83.7              | 105.8                  | 42.2         | 63.3         | 50.4                      |
| 7   | 24571485  | 2.15 | NPY       | 56.7          | 112.8              | 87.9         | 73.9       | 86.9       | 111.9             | 109.3                  | 89.6         | 118.1        | 112.2                     |
| 7   | 31178749  | 2.14 | NEUROD6   | 11.3          | 19.4               | 9.4          | 21.7       | 9.3        | 14.6              | 10.4                   | 14.3         | 16.6         | 8.2                       |
| 7   | 31178749  | 2.14 | ADCYAP1R1 | 37.5          | 31.2               | 42.2         | 33.3       | 30.8       | 65.0              | 70.0                   | 42.9         | 40.8         | 38.6                      |
| 1   | 1223385   | 2.13 | SCNN1D    | 34.5          | 38.4               | 37.0         | 32.5       | 38.5       | 42.2              | 42.3                   | 36.8         | 42.5         | 36.8                      |
| 6   | 167438292 | 2.12 | FGFR1OP   | 30.7          | 28.7               | 37.4         | 34.2       | 29.2       | 38.6              | 45.8                   | 51.9         | 26.9         | 36.0                      |
| 7   | 9266388   | 2.11 | NXPH1     | 26.1          | 34.4               | 28.0         | 26.8       | 29.8       | 32.9              | 33.0                   | 35.8         | 39.6         | 30.0                      |
| 7   | 35423720  | 2.11 | HERPUD2   | 59.7          | 60.6               | 62.2         | 44.5       | 120.8      | 59.5              | 81.8                   | 61.6         | 55.3         | 59.5                      |
| 2   | 73868446  | 2.11 | NAT8      | 16.5          | 24.1               | 22.7         | 11.1       | 22.1       | 18.0              | 21.8                   | 18.7         | 14.7         | 19.6                      |
| 3   | 11400019  | 2.10 | ATG7      | 34.3          | 27.0               | 37.8         | 24.1       | 30.2       | 34.0              | 46.1                   | 35.2         | 40.5         | 49.3                      |
| 7   | 26695215  | 2.08 | SKAP2     | 64.6          | 35.9               | 29.6         | 28.1       | 69.3       | 43.1              | 64.1                   | 36.9         | 75.7         | 40.9                      |
| 9   | 37638744  | 2.05 | TOMM5     | 245.6         | 306.6              | 107.3        | 272.8      | 300.6      | 86.8              | 94.6                   | 80.4         | 112.8        | 210.6                     |
| 9   | 37638744  | 2.05 | FRMPD1    | 33.4          | 22.3               | 32.8         | 24.5       | 42.0       | 28.1              | 26.7                   | 143.8        | 26.8         | 26.5                      |
| 5   | 13769974  | 2.01 | DNAH5     | 13.9          | 16.1               | 13.1         | 11.2       | 13.2       | 15.9              | 20.0                   | 14.0         | 13.8         | 12.9                      |
| 7   | 24311069  | 1.95 | STK31     | 16.9          | 17.1               | 22.0         | 18.7       | 13.4       | 19.1              | 16.9                   | 16.1         | 15.5         | 16.5                      |
| 7   | 22929061  | 1.94 | FAM126A   | 74.1          | 30.6               | 71.4         | 34.5       | 19.0       | 35.6              | 69.8                   | 43.2         | 88.0         | 124.0                     |
| 10  | 129903016 | 1.93 | MKI67     | 17.2          | 15.4               | 34.4         | 12.1       | 17.6       | 18.0              | 16.3                   | 15.0         | 24.4         | 16.6                      |
| 1   | 36764770  | 1.92 | THRAP3    | 116.1         | 106.7              | 173.0        | 69.5       | 162.7      | 162.6             | 195.9                  | 131.7        | 112.2        | 173.5                     |
| 20  | 36956026  | 1.92 | BPI       | 23.1          | 22.1               | 24.2         | 21.6       | 23.7       | 26.9              | 26.9                   | 23.0         | 25.3         | 22.2                      |
| 7   | 33571828  | 1.91 | BBS9      | 50.8          | 26.3               | 37.7         | 28.3       | 50.4       | 56.8              | 76.2                   | 172.9        | 39.3         | 37.8                      |

Genes are from the variant-based linkage analysis and were ranked by HLOD scores. The columns represent the chromosome, position, LOD and HLOD scores, gene symbol and ten eye tissues. Scale and color intensity represent PLIER values as reported in the ocular tissue database.

**Supplementary Figure S3: Heat map of mean ocular expression values for significant and suggestive genes from gene-based two-point linkage analysis.**

| CHR | POS       | HLOD | GENE      | Choroid.PLIER | Ciliary_body.PLIER | Cornea.PLIER | Iris.PLIER | Lens.PLIER | Optic_nerve.PLIER | Optic_nerve_head.PLIER | Retina.PLIER | Sclera.PLIER | Trabecular_meshwork.PLIER |
|-----|-----------|------|-----------|---------------|--------------------|--------------|------------|------------|-------------------|------------------------|--------------|--------------|---------------------------|
| 7   | 24571485  | 2.15 | MPP6      | 29.8          | 22.8               | 128.6        | 19.1       | 281.5      | 83.7              | 105.8                  | 42.2         | 63.3         | 50.4                      |
| 7   | 24571485  | 2.15 | NPY       | 56.7          | 112.8              | 87.9         | 73.9       | 86.9       | 111.9             | 109.3                  | 89.6         | 118.1        | 112.2                     |
| 7   | 31178749  | 2.14 | NEUROD6   | 11.3          | 19.4               | 9.4          | 21.7       | 9.3        | 14.6              | 10.4                   | 14.3         | 16.6         | 8.2                       |
| 7   | 31178749  | 2.14 | ADCYAP1R1 | 37.5          | 31.2               | 42.2         | 33.3       | 30.8       | 65.0              | 70.0                   | 42.9         | 40.8         | 38.6                      |
| 1   | 1223385   | 2.13 | SCNN1D    | 34.5          | 38.4               | 37.0         | 32.5       | 38.5       | 42.2              | 42.3                   | 36.8         | 42.5         | 36.8                      |
| 6   | 167438292 | 2.12 | FGFR1OP   | 30.7          | 28.7               | 37.4         | 34.2       | 29.2       | 38.6              | 45.8                   | 51.9         | 26.9         | 36.0                      |
| 7   | 9266388   | 2.11 | NXPH1     | 26.1          | 34.4               | 28.0         | 26.8       | 29.8       | 32.9              | 33.0                   | 35.8         | 39.6         | 30.0                      |
| 7   | 35423720  | 2.11 | HERPUD2   | 59.7          | 60.6               | 62.2         | 44.5       | 120.8      | 59.5              | 81.8                   | 61.6         | 55.3         | 59.5                      |
| 2   | 73868446  | 2.11 | NAT8      | 16.5          | 24.1               | 22.7         | 11.1       | 22.1       | 18.0              | 21.8                   | 18.7         | 14.7         | 19.6                      |
| 3   | 11400019  | 2.10 | ATG7      | 34.3          | 27.0               | 37.8         | 24.1       | 30.2       | 34.0              | 46.1                   | 35.2         | 40.5         | 49.3                      |
| 7   | 26695215  | 2.08 | SKAP2     | 64.6          | 35.9               | 29.6         | 28.1       | 69.3       | 43.1              | 64.1                   | 36.9         | 75.7         | 40.9                      |
| 9   | 37638744  | 2.05 | TOMM5     | 245.6         | 306.6              | 107.3        | 272.8      | 300.6      | 86.8              | 94.6                   | 80.4         | 112.8        | 210.6                     |
| 9   | 37638744  | 2.05 | FRMPD1    | 33.4          | 22.3               | 32.8         | 24.5       | 42.0       | 28.1              | 26.7                   | 143.8        | 26.8         | 26.5                      |
| 5   | 13769974  | 2.01 | DNAH5     | 13.9          | 16.1               | 13.1         | 11.2       | 13.2       | 15.9              | 20.0                   | 14.0         | 13.8         | 12.9                      |
| 7   | 24311069  | 1.95 | STK31     | 16.9          | 17.1               | 22.0         | 18.7       | 13.4       | 19.1              | 16.9                   | 16.1         | 15.5         | 16.5                      |
| 7   | 22929061  | 1.94 | FAM126A   | 74.1          | 30.6               | 71.4         | 34.5       | 19.0       | 35.6              | 69.8                   | 43.2         | 88.0         | 124.0                     |
| 10  | 129903016 | 1.93 | MKI67     | 17.2          | 15.4               | 34.4         | 12.1       | 17.6       | 18.0              | 16.3                   | 15.0         | 24.4         | 16.6                      |
| 1   | 36764770  | 1.92 | THRAP3    | 116.1         | 106.7              | 173.0        | 69.5       | 162.7      | 162.6             | 195.9                  | 131.7        | 112.2        | 173.5                     |
| 20  | 36956026  | 1.92 | BPI       | 23.1          | 22.1               | 24.2         | 21.6       | 23.7       | 26.9              | 26.9                   | 23.0         | 25.3         | 22.2                      |
| 7   | 33571828  | 1.91 | BBS9      | 50.8          | 26.3               | 37.7         | 28.3       | 50.4       | 56.8              | 76.2                   | 172.9        | 39.3         | 37.8                      |

Genes are from the gene-based linkage analysis and were ranked by HLOD scores. The columns represent the chromosome, position, LOD and HLOD scores, gene symbol and ten eye tissues. Scale and color intensity represent PLIER values as reported in the ocular tissue database.
